# Supplementary material for: Dielectric response of light, heavy and heavy-oxygen water: isotope effects on the hydrogen-bonding network's collective relaxation dynamics
Source: Royal Society of Chemistry journal article supplement (doi:10.1039/d0cp06460b), 2021-01-01
Supplement: d0cp06460b1.pdf [file d0cp06460b1.pdf]

## SUPPORTING INFORMATION

### Dielectric Response of Light, Heavy and Heavy-Oxygen Water: Isotope Effects on the Hydrogen-Bonding Network's Collective Relaxation Dynamics

Bence Kutus,<sup>1</sup> Andrey Shalit,<sup>2</sup> Peter Hamm<sup>2</sup> and Johannes Hunger<sup>1,\*</sup>

<sup>1</sup> *Department of Molecular Spectroscopy, Max Planck Institute for Polymer Research,  
Ackermannweg 10, 55128 Mainz, Germany*

<sup>2</sup> *Department of Chemistry, University of Zurich, Winterthurerstrasse 190, 8057 Zurich, Switzerland*

\*Corresponding author: [hunger@mpip-mainz.mpg.de](mailto:hunger@mpip-mainz.mpg.de)

## Supporting Tables and Figures for the experimental dielectric spectra and fitted parameters

**Table S1** Dielectric parameters for the cooperative (c) and fast (f) relaxation modes of light water, H<sub>2</sub><sup>16</sup>O, taken from literature:<sup>S1</sup> static ( $\epsilon_s$ ) and infinite-frequency ( $\epsilon_\infty$ ) permittivities, relaxation amplitudes ( $S_c$  and  $S_f$ ) as well as relaxation times ( $\tau_c$  and  $\tau_f$ ). Also shown is the triple standard deviation of each parameter, obtained by fitting 12–16 spectra individually using Eq. 2 (main text).

| $T / \text{K}$ | $\epsilon_s$ | $\epsilon_\infty^a$ | $S_c$        | $S_f$       | $\tau_c / \text{ps}$ | $\tau_f / \text{ps}$ |
|----------------|--------------|---------------------|--------------|-------------|----------------------|----------------------|
| 278            | 85.77 ± 0.37 | 3.95                | 79.53 ± 0.25 | 2.29 ± 0.14 | 14.60 ± 0.36         | 0.50 ± 0.15          |
| 288            | 81.90 ± 0.40 | 3.66                | 75.92 ± 0.25 | 2.32 ± 0.15 | 10.80 ± 0.29         | 0.33 ± 0.16          |
| 298            | 78.17 ± 0.08 | 3.48                | 72.30 ± 0.06 | 2.39 ± 0.04 | 8.32 ± 0.04          | 0.26 ± 0.05          |
| 308            | 74.42 ± 0.12 | 3.06                | 68.96 ± 0.12 | 2.40 ± 0.04 | 6.53 ± 0.02          | 0.18 ± 0.06          |
| 318            | 71.29 ± 0.07 | 2.68                | 65.96 ± 0.07 | 2.65 ± 0.07 | 5.31 ± 0.01          | 0.15 ± 0.05          |
| 328            | 67.99 ± 0.07 | 2.59                | 62.69 ± 0.06 | 2.71 ± 0.09 | 4.38 ± 0.02          | 0.16 ± 0.05          |
| 338            | 65.32 ± 0.12 | 2.62                | 60.03 ± 0.15 | 2.67 ± 0.19 | 3.70 ± 0.03          | 0.13 ± 0.09          |

<sup>a</sup> In the present work,  $\epsilon_\infty$  was fixed to literature data of H<sub>2</sub><sup>16</sup>O.<sup>S1</sup>

**Table S2** Dielectric parameters for the cooperative (c) and fast (f) relaxation modes of heavy-oxygen water, H<sub>2</sub><sup>18</sup>O, determined in the present work by fitting 12–16 spectra individually, using Eq. 2 (main text): static ( $\epsilon_s$ ) and infinite-frequency ( $\epsilon_\infty$ ) permittivities, relaxation amplitudes ( $S_c$  and  $S_f$ ) as well as relaxation times ( $\tau_c$  and  $\tau_f$ ). Also shown is the triple standard deviation of each parameter.

| $T / \text{K}$ | $\epsilon_s$ | $\epsilon_\infty^a$ | $S_c$        | $S_f$       | $\tau_c / \text{ps}$ | $\tau_f / \text{ps}$     |
|----------------|--------------|---------------------|--------------|-------------|----------------------|--------------------------|
| 278            | 85.72 ± 0.26 | 3.95                | 79.46 ± 0.22 | 2.30 ± 0.09 | 15.18 ± 0.25         | 0.56 ± 0.09              |
| 288            | 81.88 ± 0.28 | 3.66                | 75.96 ± 0.22 | 2.26 ± 0.08 | 11.23 ± 0.25         | 0.31 ± 0.12              |
| 298            | 78.12 ± 0.08 | 3.48                | 72.34 ± 0.07 | 2.31 ± 0.03 | 8.65 ± 0.02          | 0.22 ± 0.03              |
| 308            | 74.49 ± 0.05 | 3.06                | 69.08 ± 0.04 | 2.35 ± 0.03 | 6.83 ± 0.01          | 0.12 ± 0.03              |
| 318            | 71.44 ± 0.08 | 2.68                | 66.27 ± 0.09 | 2.48 ± 0.06 | 5.52 ± 0.02          | 0.05 ± 0.04              |
| 328            | 68.21 ± 0.07 | 2.59                | 62.81 ± 0.09 | 2.81 ± 0.08 | 4.53 ± 0.02          | 0.28 ± 0.05              |
| 338            | 65.55 ± 0.08 | 2.62                | 60.07 ± 0.10 | 2.86 ± 0.04 | 3.89 ± 0.01          | 0.13 ± 0.09 <sup>b</sup> |

<sup>a</sup> In the present work,  $\epsilon_\infty$  was fixed to literature data of H<sub>2</sub><sup>16</sup>O.<sup>S1</sup>

<sup>b</sup>  $\tau_f$  was fixed to that of H<sub>2</sub><sup>16</sup>O.<sup>S1</sup>

**Table S3** Dielectric parameters for the cooperative (c) and fast (f) relaxation modes of heavy water, D<sub>2</sub><sup>16</sup>O, determined in the present work by fitting 12–16 spectra individually using Eq. 2 (main text): static ( $\epsilon_s$ ) and infinite-frequency ( $\epsilon_\infty$ ) permittivities, relaxation amplitudes ( $S_c$  and  $S_f$ ) as well as relaxation times ( $\tau_c$  and  $\tau_f$ ). Also shown is the triple standard deviation of each parameter.

| $T / \text{K}$ | $\epsilon_s$ | $\epsilon_\infty^a$ | $S_c$        | $S_f$       | $\tau_c / \text{ps}$ | $\tau_f / \text{ps}$ |
|----------------|--------------|---------------------|--------------|-------------|----------------------|----------------------|
| 278            | 86.18 ± 0.12 | 3.40                | 80.43 ± 0.10 | 2.35 ± 0.03 | 19.68 ± 0.18         | 0.35 ± 0.04          |
| 288            | 81.81 ± 0.32 | 3.23                | 76.29 ± 0.27 | 2.29 ± 0.06 | 13.60 ± 0.24         | 0.22 ± 0.10          |
| 298            | 77.76 ± 0.10 | 3.13                | 72.27 ± 0.10 | 2.36 ± 0.03 | 10.52 ± 0.04         | 0.25 ± 0.04          |
| 308            | 74.11 ± 0.09 | 2.95                | 69.04 ± 0.08 | 2.12 ± 0.02 | 8.22 ± 0.03          | 0.29 ± 0.04          |
| 318            | 71.02 ± 0.08 | 2.70                | 66.23 ± 0.08 | 2.09 ± 0.06 | 6.59 ± 0.02          | 0.37 ± 0.05          |
| 328            | 67.72 ± 0.12 | 2.46                | 63.13 ± 0.14 | 2.04 ± 0.15 | 5.37 ± 0.03          | 0.69 ± 0.09          |
| 338            | 64.91 ± 0.13 | 2.25                | 60.48 ± 0.21 | 2.18 ± 0.29 | 4.47 ± 0.04          | 0.67 ± 0.18          |

<sup>a</sup> In the present work,  $\epsilon_\infty$  was fixed to literature data of D<sub>2</sub><sup>16</sup>O.<sup>S1</sup>

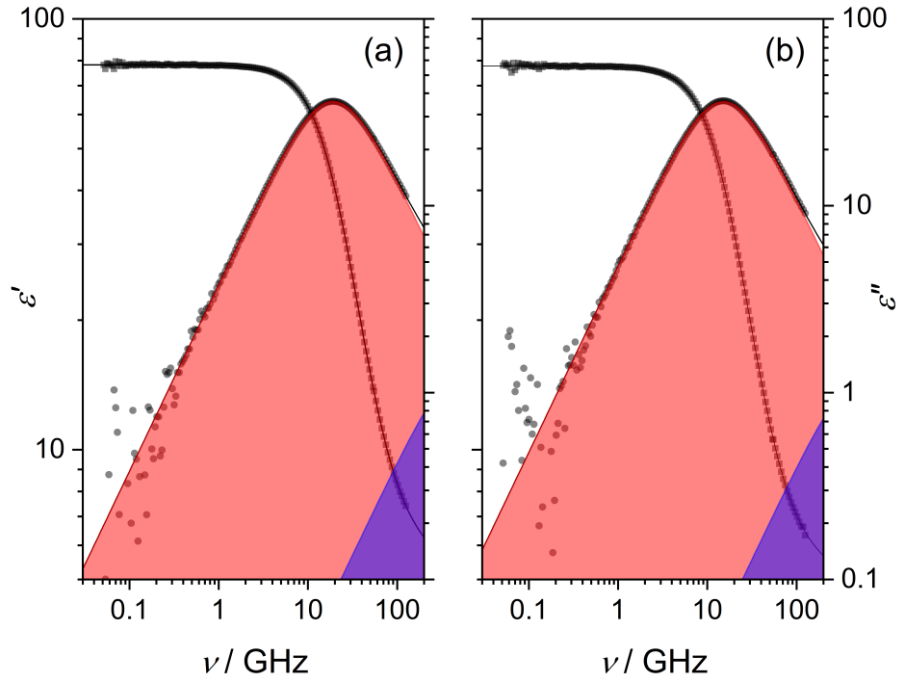

**Figure S1** Relative permittivity ( $\epsilon'$ , left axis) and dielectric loss ( $\epsilon''$ , right axis) spectra of  $\text{H}_2^{16}\text{O}$  (a) and  $\text{D}_2^{16}\text{O}$  (b) at 298 K. Squares and circles represent the experimental  $\epsilon'$  and  $\epsilon''$  data, respectively; the black solid lines show the fits using Eq. 2. Red and purple shaded areas depict the contribution of the cooperative and fast relaxation modes to  $\epsilon''$ , as obtained from the fit. For visual clarity, the last term of Eq. 2 was subtracted from  $\epsilon''$ .

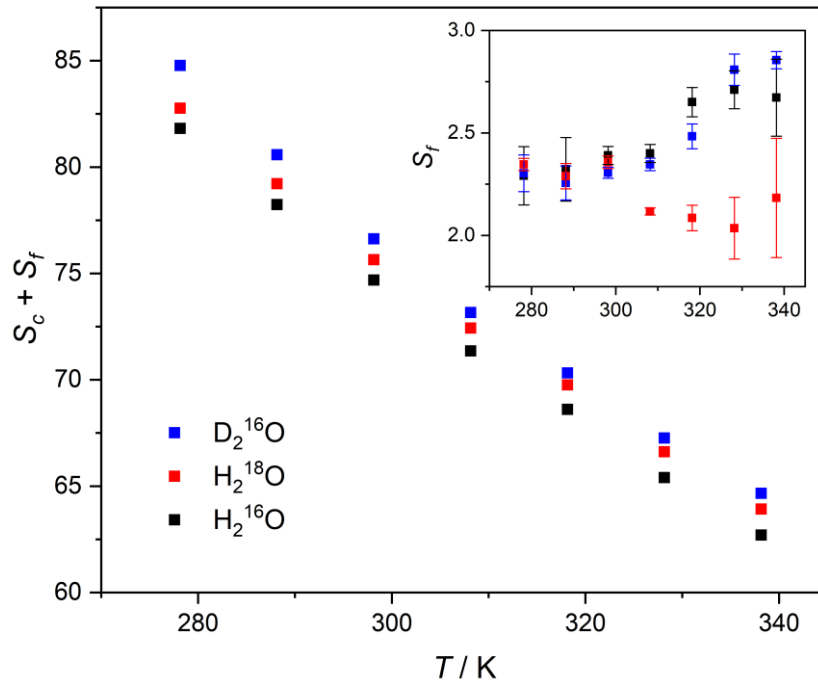

**Figure S2** Total relaxation amplitude of the cooperative and fast relaxation modes ( $S_c + S_f$ ) for  $\text{H}_2^{16}\text{O}$ ,  $\text{H}_2^{18}\text{O}$  as well as  $\text{D}_2^{16}\text{O}$  as a function of temperature, as obtained by fitting Eq. 2 (main text) to the experimental complex permittivity spectra. The corresponding error bars are smaller than the size of the symbols. For visual clarity, the data of  $\text{H}_2^{18}\text{O}$  and  $\text{D}_2^{16}\text{O}$  are shifted by 1 and 2 along the vertical axis. Inset: relaxation amplitude of the fast mode ( $S_f$ ). The error bars represent the triple standard deviations.

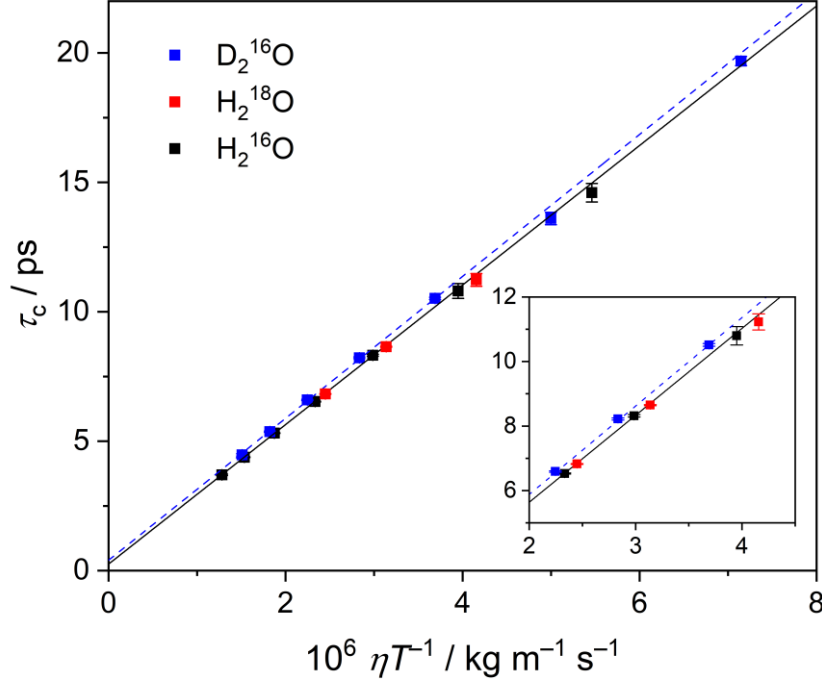

**Figure S3** Relaxation time of the cooperative relaxation mode ( $\tau_c$ ) as a function of  $\eta T^{-1}$ , ( $\eta$ : viscosity,  $T$ : temperature) for  $\text{H}_2^{16}\text{O}$ ,  $\text{H}_2^{18}\text{O}$  and  $\text{D}_2^{16}\text{O}$ . Inset: zoomed region of the same plot. Symbols represent experimental data, while the solid black ( $\text{H}_2^{16}\text{O}$ ) and dashed blue lines ( $\text{D}_2^{16}\text{O}$ ) are the results of the fits  $\tau_c = a + b \cdot \eta T^{-1}$ . The corresponding fitted parameters and triple standard errors:  $a = (0.25 \pm 0.09) \cdot 10^{-12}$  s,  $b = (2.70 \pm 0.06) \cdot 10^{-6}$  s<sup>2</sup>·m·kg for  $\text{H}_2^{16}\text{O}$  and  $a = (0.40 \pm 0.24) \cdot 10^{-12}$  s,  $b = (2.74 \pm 0.09) \cdot 10^{-6}$  s<sup>2</sup>·m·kg for  $\text{D}_2^{16}\text{O}$ .

## Modelling the isotope effect on the relaxation time upon H/D substitution

In the main text we use a translational mass factor,  $\sqrt{M(\text{D}_2^{16}\text{O})/M(\text{H}_2^{16}\text{O})}$ , and an apparent temperature shift,  $\Delta T$ , to map the relaxation times of  $\text{D}_2^{16}\text{O}$  onto those of  $\text{H}_2^{16}\text{O}$  (see Eq. 7 of the main text), by assuming the same translational mass factor accounting for the classical mass effect for  $\text{D}_2^{16}\text{O}$  and  $\text{H}_2^{18}\text{O}$  as compared to  $\text{H}_2^{16}\text{O}$ . To determine  $\Delta T$  (Eq. 7 of the main text), we determine the sum of their squared deviations,  $\chi^2$ :

$$\chi^2 = \sum_{i=1}^n \left( \sqrt{M(\text{D}_2^{16}\text{O})/M(\text{H}_2^{16}\text{O})} \cdot \tau_c(\text{H}_2^{16}\text{O}, T_i - \Delta T) - \tau_c(\text{D}_2^{16}\text{O}, T_i) \right)^2 \quad (\text{S1})$$

as a function of  $\Delta T$ . Here, we interpolate  $\tau_c(\text{H}_2^{16}\text{O}, T)$  using the fitting results described in the main text (Eqs. 3–5, Table 1). These deviations (Figure S4) show a minimum for  $\Delta T = 7.16$  K.

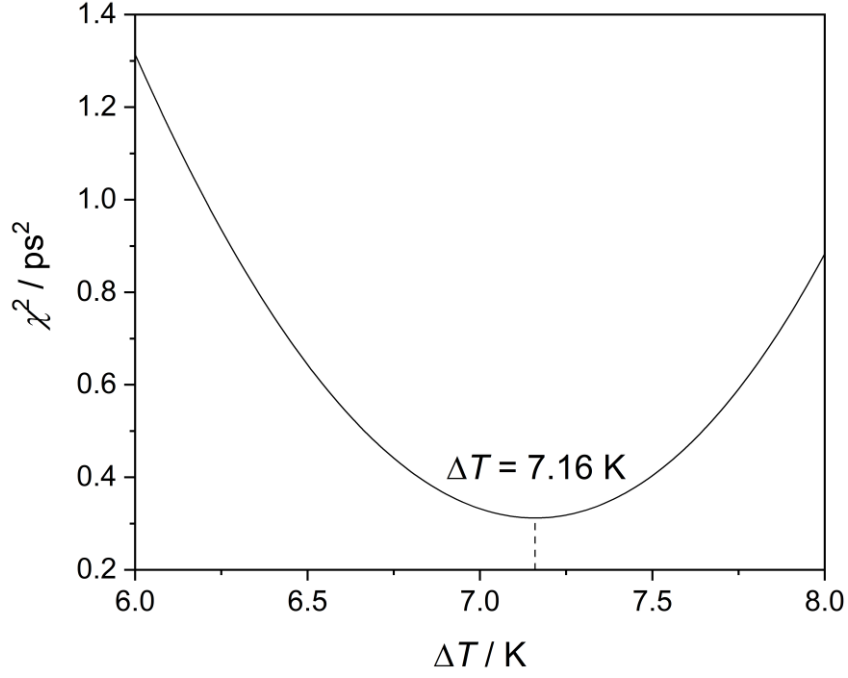

**Figure S4**  $\chi^2$  (Eq. S1) as a function of the apparent temperature shift,  $\Delta T$ . The value of  $\Delta T$  at the minimum is labelled in the figure.

To support the assumption that classical mass effects for  $\text{D}_2^{16}\text{O}$  can be accounted for by the same translational mass factor as for  $\text{H}_2^{18}\text{O}$ , we also test the analogous mapping by treating the mass factor,  $\alpha$ , as an adjustable parameter:

$$\tau_c(\text{D}_2^{16}\text{O}, T) = \alpha \cdot \tau_c(\text{H}_2^{16}\text{O}, T - \Delta T) \quad (\text{S2})$$

Here, we fit  $\Delta T$  as a function of  $\alpha$  by minimizing the following  $\chi^2$ :

$$\chi^2 = \sum_{i=1}^n \left( \alpha \cdot \tau_c(\text{H}_2^{16}\text{O}, T_i - \Delta T) - \tau_c(\text{D}_2^{16}\text{O}, T_i) \right)^2 \quad (\text{S3})$$

The results of this minimization (Figure S5) demonstrate that the parameters  $\alpha$  and  $\Delta T$  are correlated. The minimum of  $\chi^2$  at  $\alpha = 1.054$  coincides with  $\sqrt{M(\text{D}_2^{16}\text{O})/M(\text{H}_2^{16}\text{O})}$ , which suggests that for the enhancement of the dielectric relaxation time upon H/D exchange the translational mass factor can account for classical mass effects, similar to  $^{16}\text{O}/^{18}\text{O}$  substitution.

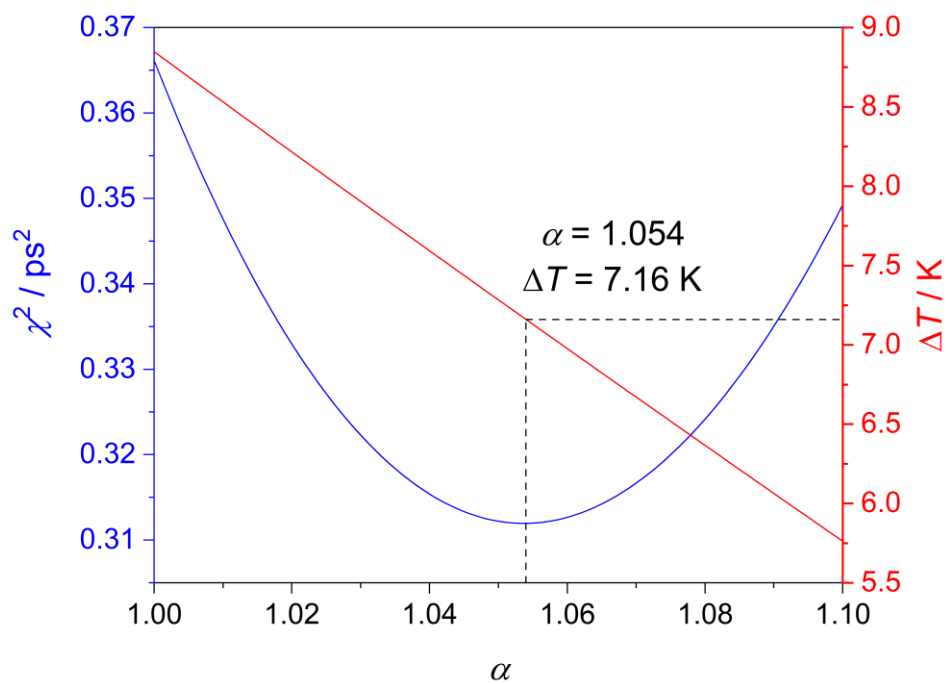

**Figure S5** Minimized  $\chi^2$  (Eq. S3, left axis) and the fitted apparent temperature shift,  $\Delta T$ , (right axis) as a function of  $\alpha$  (see Eqs. S2 and S3). The values of  $\alpha$  and  $\Delta T$  corresponding to the minimum value of  $\chi^2$  are labelled in the figure.

## Supporting References

S1. S. Schrödle, PhD thesis, University of Regensburg, 2005
